# Supplementary material for: The p97/VCP segregase is essential for arsenic-induced degradation of PML and PML-RARA
Source: PubMed Central journal article supplement (PMC10005898; doi:10.1083/jcb.202201027), 2023-02-28
Supplement: JCB_202201027_SourceDataF1.pdf [file JCB_202201027_SourceDataF1.pdf]

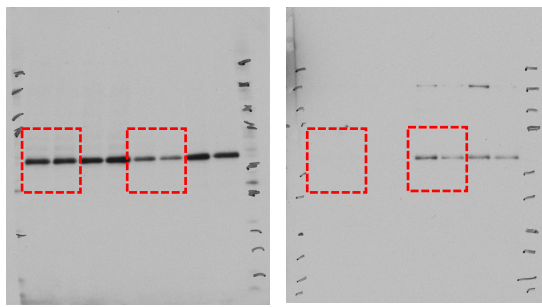

Fig. 1D (p62)

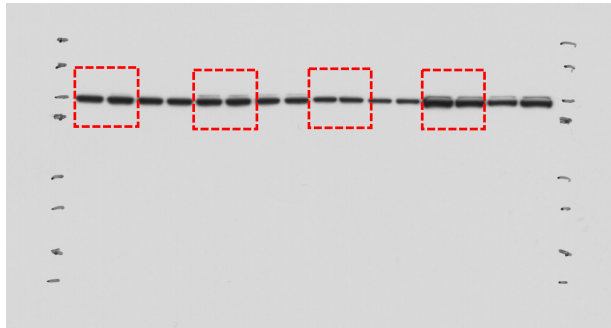

Fig. 1D (p97)

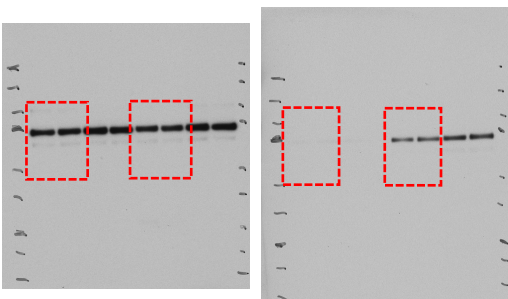

Fig. 1D (PIAS1)

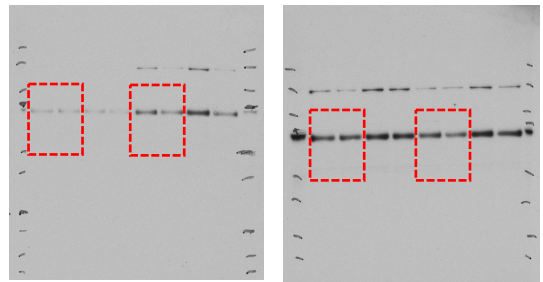

Fig. 1D (SENP1)

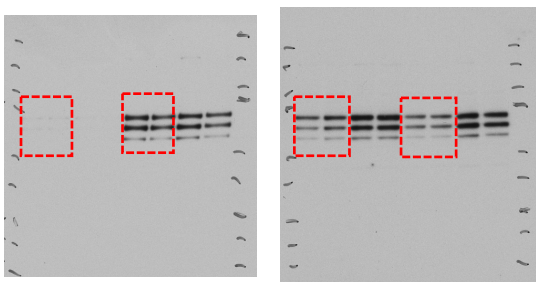

Fig. 1D (PIAS3)

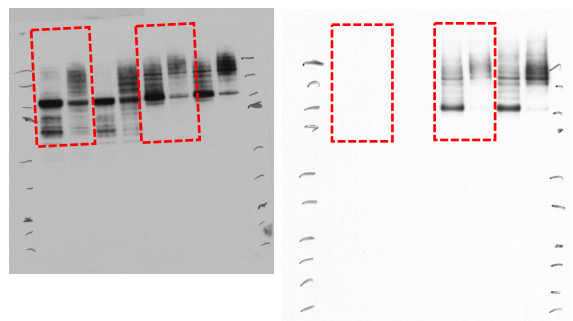

Fig. 1D (PML)

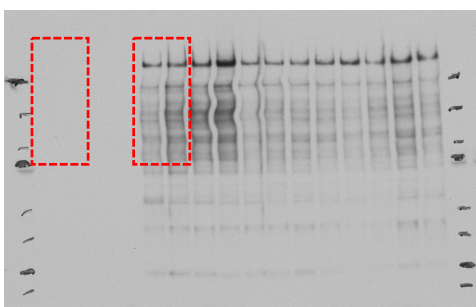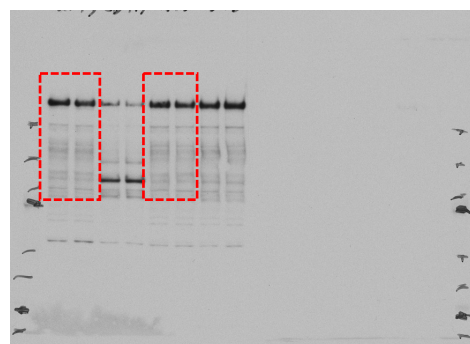

Fig. 1D (SETX)
