# Supplementary material for: The p97/VCP segregase is essential for arsenic-induced degradation of PML and PML-RARA
Source: PubMed Central journal article supplement (PMC10005898; doi:10.1083/jcb.202201027), 2023-02-28

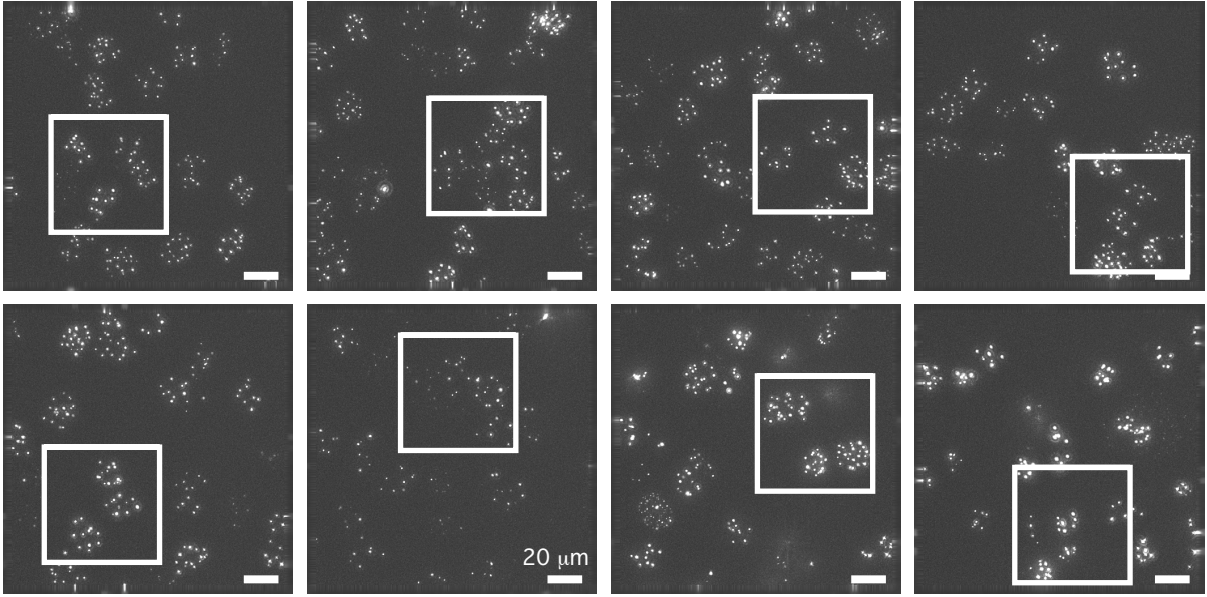

Supplement: JCB_202201027_SourceDataF3.pdf [file JCB_202201027_SourceDataF3.pdf]
