# Supplementary material for: The p97/VCP segregase is essential for arsenic-induced degradation of PML and PML-RARA
Source: PubMed Central journal article supplement (PMC10005898; doi:10.1083/jcb.202201027), 2023-02-28

Fig. 6 A

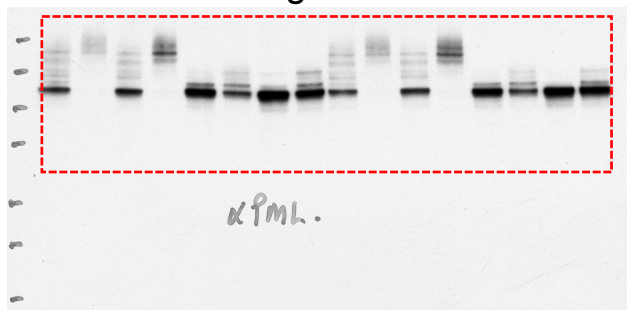

Fig. 6 D

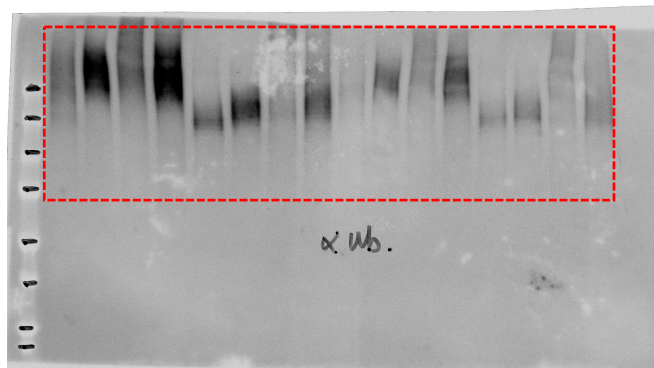

Fig. 6 B

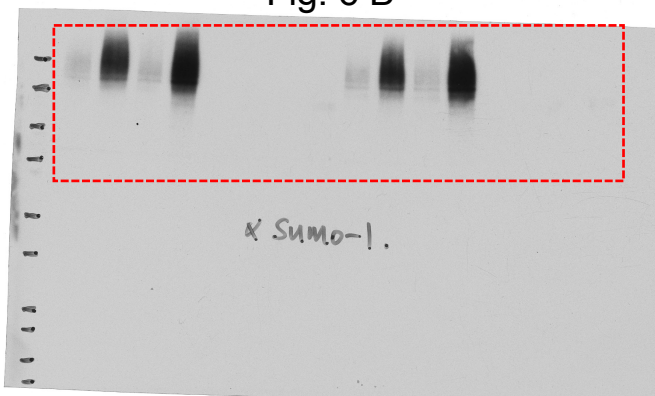

Fig. 6 E

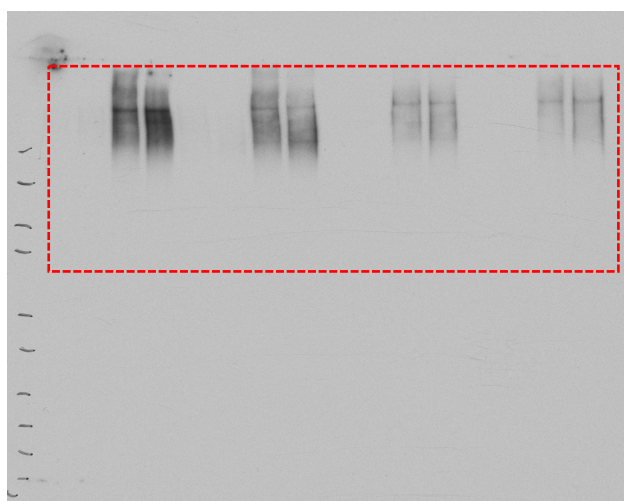

Fig. 6 C

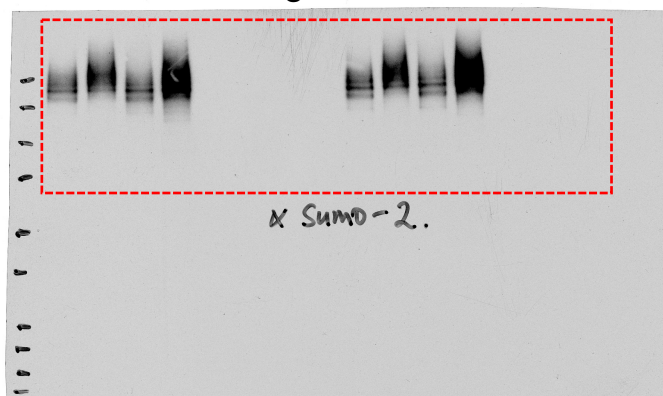

Fig. 6 F

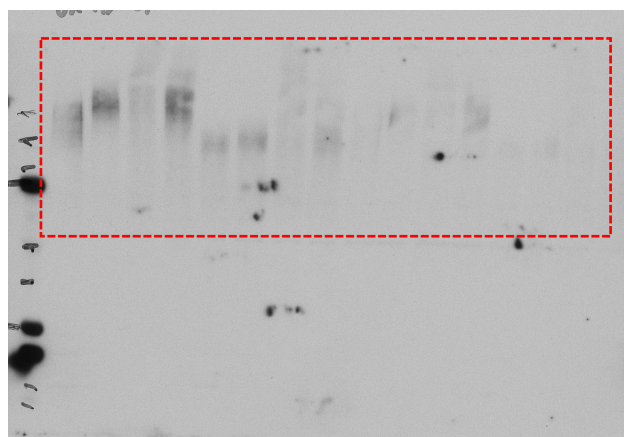

Supplement: JCB_202201027_SourceDataF6.pdf [file JCB_202201027_SourceDataF6.pdf]
