# Supplementary material for: The p97/VCP segregase is essential for arsenic-induced degradation of PML and PML-RARA
Source: PubMed Central journal article supplement (PMC10005898; doi:10.1083/jcb.202201027), 2023-02-28
Supplement: JCB_202201027_SourceDataF7.pdf [file JCB_202201027_SourceDataF7.pdf]

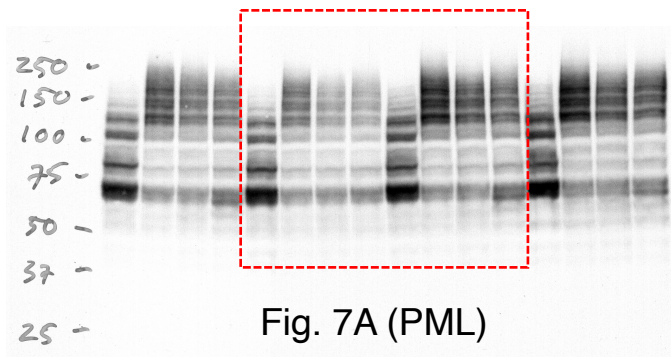

Fig. 7A (PML)

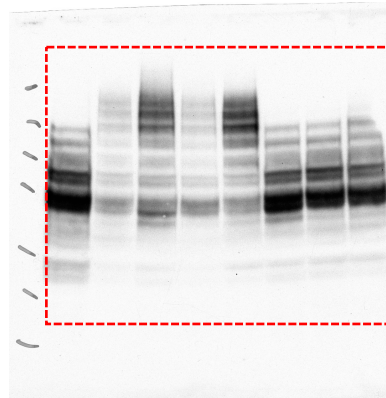

Fig. 7B (PML)

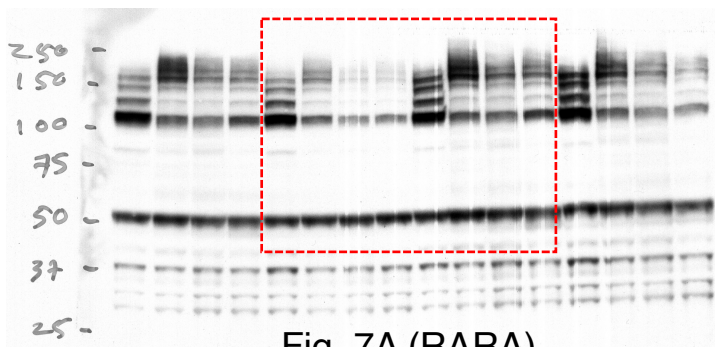

Fig. 7A (RARA)

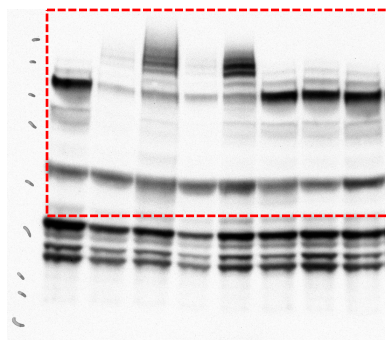

Fig. 7B (RARA)

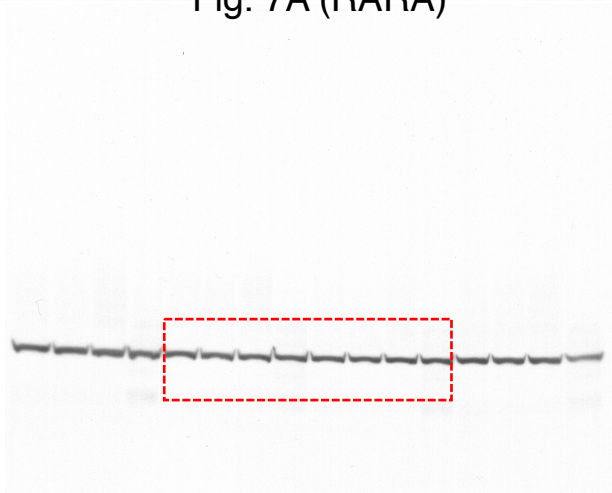

Fig. 7A (p97)

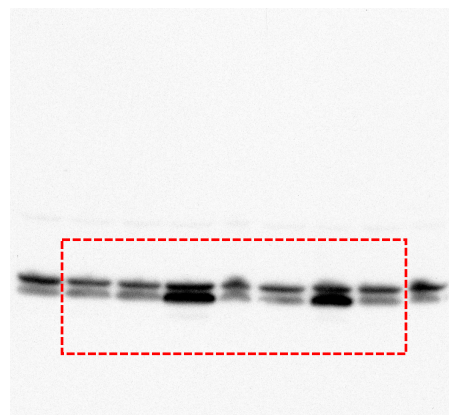

Fig. 7B (LC3)

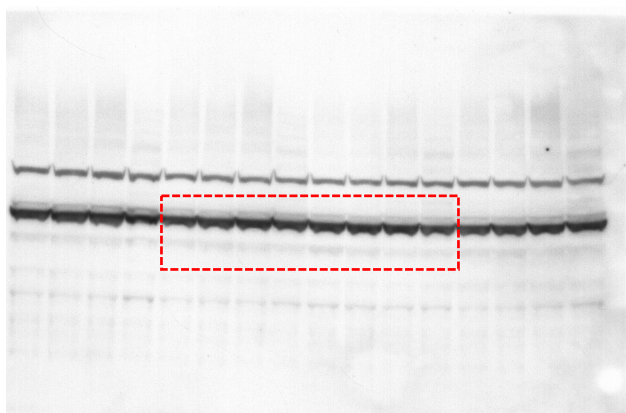

Fig. 7A (NPL4)

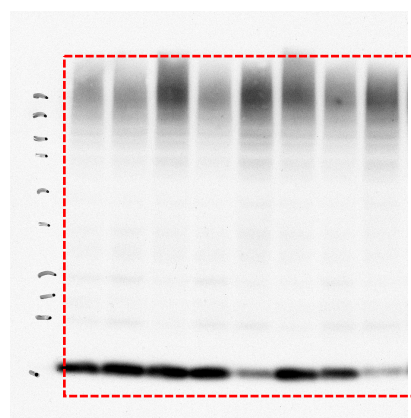

Fig 7B (Ubiquitin)
