# Supplementary material for: The p97/VCP segregase is essential for arsenic-induced degradation of PML and PML-RARA
Source: PubMed Central journal article supplement (PMC10005898; doi:10.1083/jcb.202201027), 2023-02-28

Supp. Fig. 1A

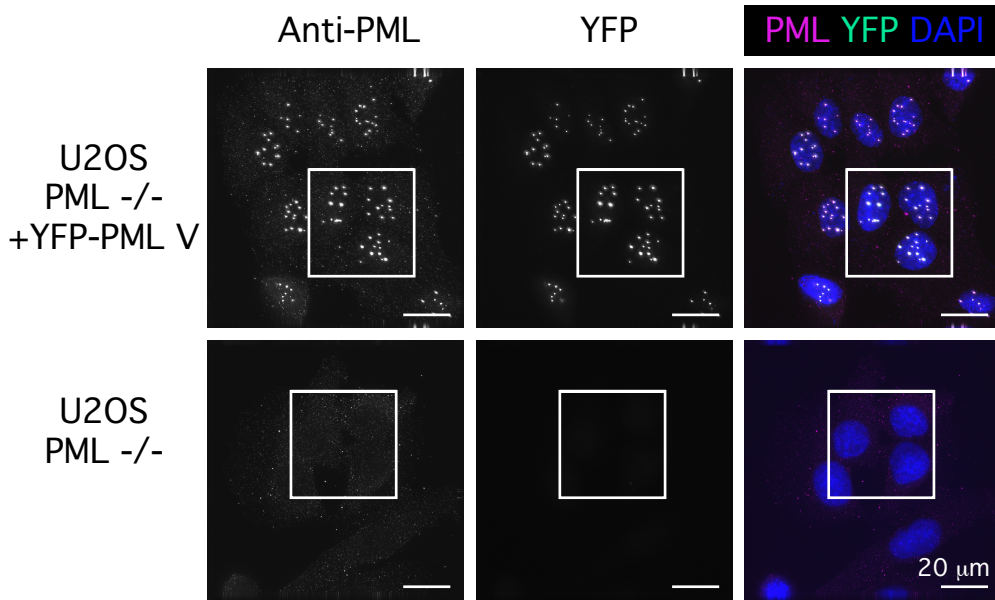

Supp. Fig. 1B (Left)      Supp. Fig. 1B (Right)

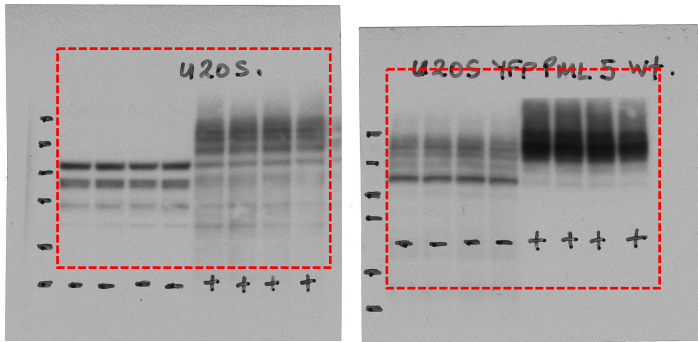

Supp. Fig. 1D (Lower)

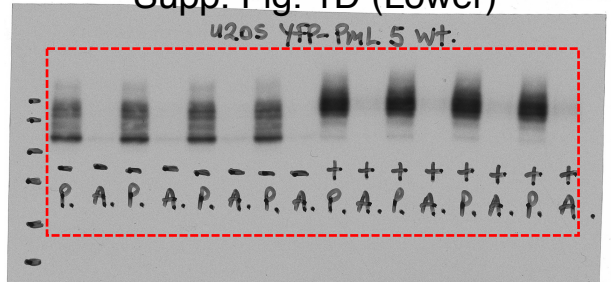

Supp. Fig. 1D (Upper)

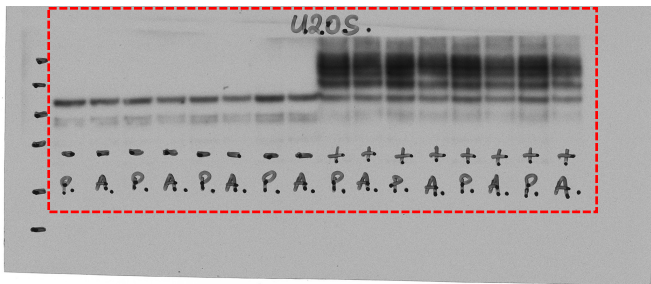

Supp. Fig. 1E

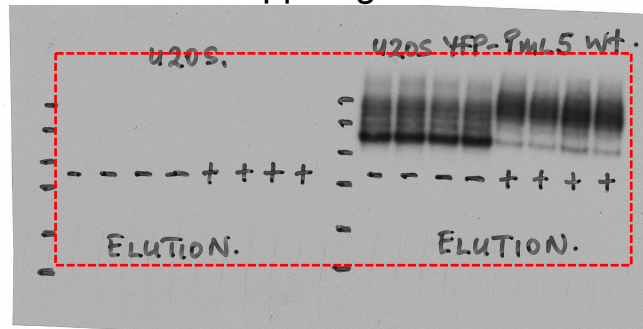

Supplement: JCB_202201027_SourceDataFS1.pdf [file JCB_202201027_SourceDataFS1.pdf]
