# Supplementary material for: The p97/VCP segregase is essential for arsenic-induced degradation of PML and PML-RARA
Source: PubMed Central journal article supplement (PMC10005898; doi:10.1083/jcb.202201027), 2023-02-28
Supplement: JCB_202201027_SourceDataFS2.pdf [file JCB_202201027_SourceDataFS2.pdf]

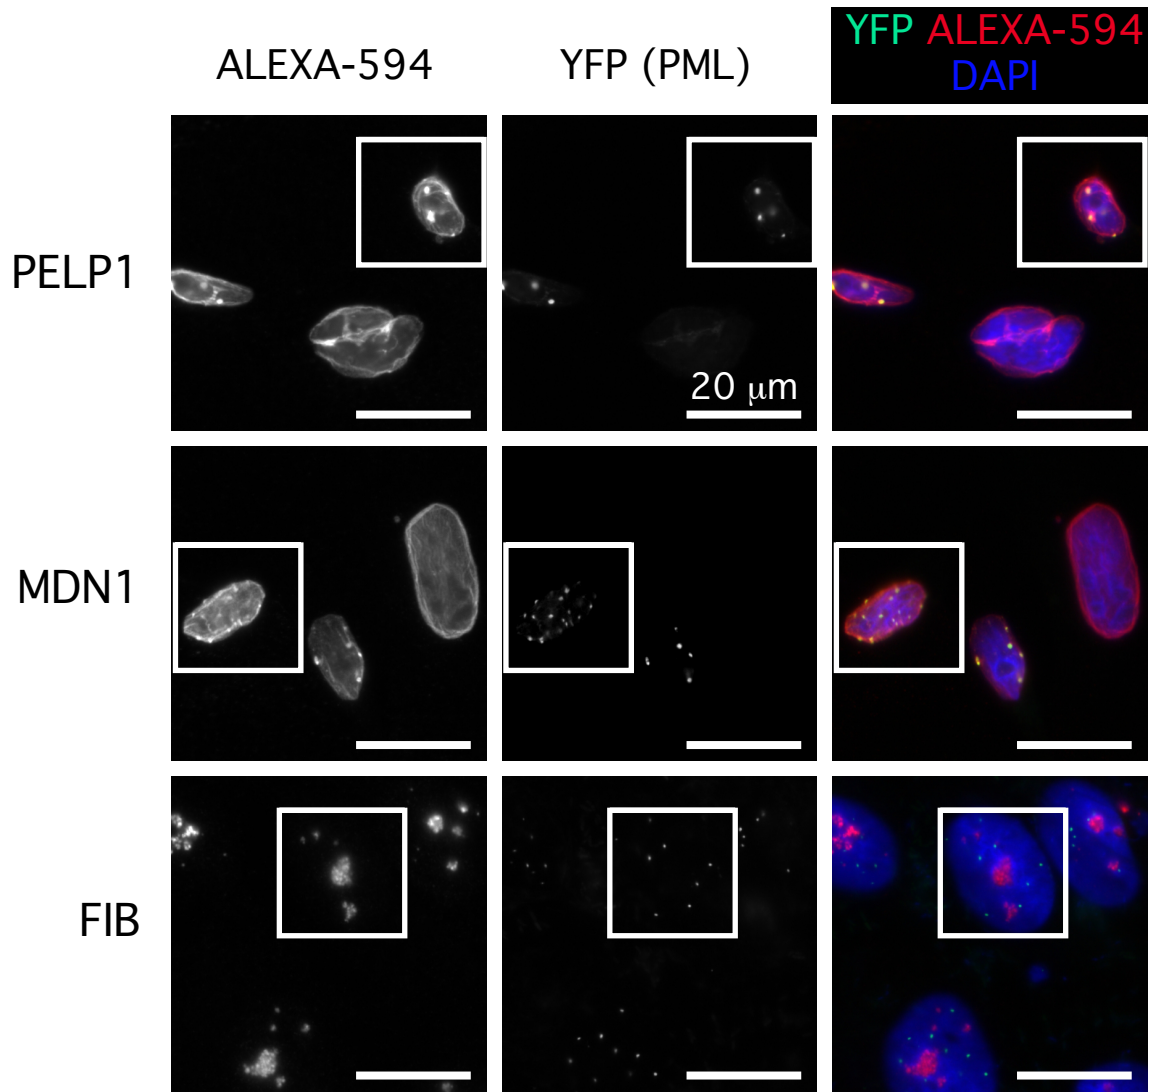

## Figure\_2023-2-10\_13:23:13 Sup2 G

Link to Figure: <https://nightshade.openmicroscopy.org/figure/file/387160/>

### **Figure contains the following images:**

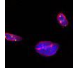

58\_YFPPML\_ATO\_PELP1\_02\_R3D.dv

<https://nightshade.openmicroscopy.org/webclient/?show=image-4550216>

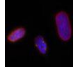

59\_YFPPML\_ATO\_MDN1\_05\_R3D.dv

<https://nightshade.openmicroscopy.org/webclient/?show=image-4550207>

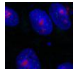

U2OS\_YFPPML\_ATO\_FIB\_01\_R3D.dv

<https://nightshade.openmicroscopy.org/webclient/?show=image-4550217>

### **Scalebars:**

Scalebar Lengths: 20  $\mu$ m
